# Supplementary material for: Evaluation of T-activated proteins as recall antigens to monitor Epstein–Barr virus and human cytomegalovirus-specific T cells in a clinical trial setting
Source: Springer Nature journal article supplement (doi:10.1186/s12967-020-02385-x), 2020-06-17
Supplement: MOESM1 [file 12967_2020_2385_MOESM1_ESM.pdf › 12967_2020_2385_MOESM1_ESM.pdf]

**Additional file 1: Table S1. Antibodies used for ICS**

| <b>Antibody</b> | <b>Assay concentration (µg/mL)</b> | <b>Company</b>  | <b>Clone</b> | <b>Compensation control</b> |
|-----------------|------------------------------------|-----------------|--------------|-----------------------------|
| CD3-V500        | 2.0                                | BD Biosciences  | SP34-2       |                             |
| CD4-PerCP       | 0.24                               | BD Biosciences  | SK3          |                             |
| CD8-ECD         | 0.16                               | Beckman Coulter | 2ST8.5H7     |                             |
| IL2-APC         | 20.0                               | BD Biosciences  | 5344.111     | CD8-APC                     |
| TNFα-eFluor450  | 0.05                               | eBioscience     | MAb11        | CD3-eF450                   |
| IFNγ-AI700      | 0.4                                | BD Biosciences  | B27          | CD3-AI700                   |
