# Supplementary material for: Evaluation of T-activated proteins as recall antigens to monitor Epstein–Barr virus and human cytomegalovirus-specific T cells in a clinical trial setting
Source: Springer Nature journal article supplement (doi:10.1186/s12967-020-02385-x), 2020-06-17
Supplement: MOESM3 [file 18093272]

Additional file 3: Table S3. Specificity of T-activated EBV- and HCMV-proteins

| Antigen    | Donor | EBV-/CMV-serostatus | SFC <sup>a</sup> /2x10 <sup>5</sup> PBMC | Specificity |
|------------|-------|---------------------|------------------------------------------|-------------|
| EBV-BZLF1  | S01   | negative            | 0                                        | 100 %       |
| EBV-BZLF1  | S02   | negative            | 0                                        |             |
| EBV-BZLF1  | S03   | negative            | 0                                        |             |
| EBV-BZLF1  | S04   | negative            | 0                                        |             |
| EBV-BZLF1  | S05   | negative            | 0                                        |             |
| EBV-BZLF1  | S06   | negative            | 0                                        |             |
| EBV-BZLF1  | S07   | negative            | 0                                        |             |
| EBV-EBNA3A | S01   | negative            | 0                                        | 86 %        |
| EBV-EBNA3A | S02   | negative            | 0                                        |             |
| EBV-EBNA3A | S03   | negative            | 0                                        |             |
| EBV-EBNA3A | S04   | negative            | 15                                       |             |
| EBV-EBNA3A | S05   | negative            | 0                                        |             |
| EBV-EBNA3A | S06   | negative            | 0                                        |             |
| EBV-EBNA3A | S07   | negative            | 0                                        |             |
| HCMV-IE1   | S01   | negative            | 0                                        | 100 %       |
| HCMV-IE1   | S02   | negative            | 0                                        |             |
| HCMV-IE1   | S03   | negative            | 0                                        |             |
| HCMV-IE1   | S04   | negative            | 0                                        |             |
| HCMV-IE1   | S05   | negative            | 0                                        |             |
| HCMV-IE1   | S06   | negative            | 0                                        |             |
| HCMV-IE1   | S07   | negative            | 0                                        |             |
| HCMV-pp65  | S01   | negative            | 0                                        | 100 %       |
| HCMV-pp65  | S02   | negative            | 0                                        |             |
| HCMV-pp65  | S03   | negative            | 0                                        |             |
| HCMV-pp65  | S04   | negative            | 0                                        |             |
| HCMV-pp65  | S05   | negative            | 0                                        |             |
| HCMV-pp65  | S06   | negative            | 0                                        |             |
| HCMV-pp65  | S07   | negative            | 0                                        |             |
| EBV-BZLF1  | S08   | positive            | 29                                       |             |
| EBV-BZLF1  | S09   | positive            | 148                                      |             |
| EBV-BZLF1  | S10   | positive            | 409                                      |             |
| EBV-EBNA3A | S08   | positive            | 40                                       |             |
| EBV-EBNA3A | S09   | positive            | 126                                      |             |
| EBV-EBNA3A | S10   | positive            | 452                                      |             |
| HCMV-IE1   | S11   | positive            | 12                                       |             |
| HCMV-IE1   | S12   | positive            | 26                                       |             |
| HCMV-IE1   | S13   | positive            | 19                                       |             |
| HCMV-pp65  | S11   | positive            | 128                                      |             |
| HCMV-pp65  | S12   | positive            | 572                                      |             |
| HCMV-pp65  | S13   | positive            | 235                                      |             |

<sup>a</sup> Values are the mean number of antigen-specific IFN- $\gamma$  SFC/2x10<sup>5</sup> PBMC (stimulated with 10  $\mu$ g/ml EBV-BZLF1, 15  $\mu$ g/ml EBV-EBNA3A, 3  $\mu$ g/ml HCMV-pp65, and 15.6  $\mu$ g/ml HCMV-IE1 T-activated proteins, respectively). Results illustrate examination of specificity of T-cell responses against EBV-BZLF1, -EBNA3A, HCMV-IE1, and -pp65 TP in a cohort of EBV- and HCMV-seronegative donors, where an absence of a recall response to EBV- and HCMV-derived antigens is expected. Additionally, numbers of SFC of six donors with confirmed positive EBV- and HCMV-serostatus are listed.
